# Supplementary material for: Discovering the bacteriome of Vitis vinifera cv. Pinot Noir in a conventionally managed vineyard
Source: PubMed Central journal article supplement (PMC7160115; doi:10.1038/s41598-020-63154-w), 2020-04-15
Supplement: 41598_2020_63154_MOESM1_ESM.pdf [file 41598_2020_63154_MOESM1_ESM.pdf]

1 **Discovering the bacteriome of *Vitis vinifera* cv. Pinot Noir in a conventionally managed**  
2 **vineyard**

3

4 Elisa Gamalero<sup>1</sup>, Elisa Bona<sup>2</sup>, Giorgia Novello<sup>1</sup>, Lara Boatti<sup>3</sup>, Flavio Mignone<sup>1,3</sup>, Nadia  
5 Massa<sup>1</sup>, Patrizia Cesaro<sup>1\*</sup>, Graziella Berta<sup>1</sup>, Guido Lingua<sup>1</sup>

6

7 <sup>1</sup> Università del Piemonte Orientale, Dipartimento di Scienze e Innovazione Tecnologica,  
8 viale T. Michel 11, Alessandria 15121, Italy

9 <sup>2</sup> Università del Piemonte Orientale, Dipartimento di Scienze e Innovazione Tecnologica,  
10 Piazza San Eusebio 5, 13100 Vercelli, Italy

11 <sup>3</sup> SmartSeq s.r.l., spin-off of the Università del Piemonte Orientale, Viale T. Michel 11,  
12 Alessandria 15121, Italy

13

14 **Corresponding author:**

15 Dipartimento di Scienze e Innovazione Tecnologica, Università del Piemonte Orientale,

16 Viale T. Michel 11, Alessandria 15121, Italy

17 Tel: 0131 360 244

18 Fax: 0131 360 243

19 E-mail: patrizia.cesaro@uniupo.it

20

21

22

23

24

25

26

27 **Table S1.** Full list of the bacterial species identified in the conventional pest management vineyard and their frequencies and  
 28 significancies.

29

| phylum           | class               | order               | genus        | species                               | Frequencies |      |           |           | Significancies   |                    |                    |                      |
|------------------|---------------------|---------------------|--------------|---------------------------------------|-------------|------|-----------|-----------|------------------|--------------------|--------------------|----------------------|
|                  |                     |                     |              |                                       | BS1         | BS2  | Rhi<br>z1 | Rhi<br>z2 | BS1<br>vs<br>BS2 | BS1<br>vs<br>Rhiz1 | BS2<br>Vs<br>Rhiz2 | Rhiz1<br>vs<br>Rhiz2 |
| Actinobacteria   | Actinobacteria      | Actinomycetales     | denovo       | denovo                                | 8,49        | 7,18 | 16,9      | 8,75      | 0,222            | 0,056              | 0,151              | 0,841                |
| Actinobacteria   | Actinobacteria      | Actinomycetales     | denovo       | denovo                                | 4,95        | 7,92 | 7,57      | 5,56      | 0,032            | 0,151              | 0,548              | 0,690                |
| Actinobacteria   | Actinobacteria      | Solirubrobacterales | denovo       | denovo                                | 4,46        | 3,66 | 2,98      | 3,82      | 0,690            | 0,841              | 0,421              | 0,095                |
| Actinobacteria   | Actinobacteria      | denovo              | denovo       | denovo                                | 3,88        | 2,02 | 2,89      | 2,01      | 1,000            | 0,841              | 0,421              | 0,249                |
| Gemmatimonadetes | Gemmatimonadetes    | Gemmatimonadales    | Gemmatimonas | Gemmatimonadaceae<br>bacterium LWQ133 | 0,44        | 3,36 | 0,83      | 2,47      | 0,094            | 0,753              | 0,690              | 0,008                |
| Proteobacteria   | Alphaproteobacteria | Rhizobiales         | denovo       | denovo                                | 2,09        | 1,94 | 2,51      | 1,62      | 0,008            | 0,310              | 0,548              | 0,310                |
| Actinobacteria   | Actinobacteria      | Gaiellales          | Gaiella      | bacterium Ellin6526                   | 2,41        | 1,33 | 2,81      | 1,77      | 0,841            | 0,690              | 0,095              | 1,000                |
| Proteobacteria   | Betaproteobacteria  | denovo              | denovo       | denovo                                | 0,64        | 2,42 | 1,08      | 2,56      | 0,056            | 0,841              | 0,841              | 0,008                |
| Actinobacteria   | Actinobacteria      | Actinomycetales     | denovo       | denovo                                | 0,61        | 2,36 | 1,53      | 2,23      | 0,690            | 0,421              | 0,310              | 0,421                |
| Actinobacteria   | Actinobacteria      | Actinomycetales     | denovo       | denovo                                | 0,78        | 0,99 | 4,48      | 1,52      | 0,142            | 0,008              | 0,021              | 0,095                |
| Proteobacteria   | Alphaproteobacteria | Rhizobiales         | denovo       | denovo                                | 0,58        | 2,18 | 0,82      | 2,00      | 0,016            | 0,841              | 0,753              | 0,008                |
| Proteobacteria   | Alphaproteobacteria | Rhodospirillales    | denovo       | denovo                                | 1,31        | 1,07 | 1,69      | 1,93      | 0,173            | 0,222              | 0,016              | 0,222                |
| Proteobacteria   | Deltaproteobacteria | Myxococcales        | denovo       | denovo                                | 1,26        | 1,30 | 1,24      | 1,80      | 0,222            | 0,690              | 0,548              | 0,095                |
| Proteobacteria   | Betaproteobacteria  | Burkholderiales     | denovo       | denovo                                | 0,55        | 2,16 | 0,69      | 1,64      | 0,180            | 1,000              | 0,180              | 1,000                |
| Actinobacteria   | Actinobacteria      | Gaiellales          | Gaiella      | bacterium Ellin7530                   | 0,61        | 1,13 | 2,25      | 1,52      | 0,095            | 0,462              | 0,295              | 0,059                |

|                  |                     |                  |                |                                    |      |      |      |      |       |       |       |       |
|------------------|---------------------|------------------|----------------|------------------------------------|------|------|------|------|-------|-------|-------|-------|
| Actinobacteria   | Actinobacteria      | Actinomycetales  | Blastococcus   | bacterium Ellin6023                | 0,88 | 1,14 | 2,12 | 1,36 | 0,690 | 0,690 | 0,310 | 0,841 |
| Actinobacteria   | Actinobacteria      | Acidimicrobiales | denovo         | denovo                             | 2,81 | 1,11 | 1,13 | 0,81 | 0,310 | 1,000 | 0,530 | 0,059 |
| Actinobacteria   | Actinobacteria      | Actinomycetales  | denovo         | denovo                             | 2,52 | 1,07 | 0,87 | 1,12 | 0,548 | 0,600 | 0,310 | 0,548 |
| Proteobacteria   | Betaproteobacteria  | Burkholderiales  | denovo         | denovo                             | 1,48 | 1,90 | 0,43 | 1,09 | 0,690 | 0,841 | 0,249 | 0,151 |
| Proteobacteria   | Alphaproteobacteria | Rhodospirillales | denovo         | denovo                             | 1,27 | 1,22 | 1,06 | 1,24 | 0,095 | 0,753 | 0,222 | 0,463 |
| Actinobacteria   | Actinobacteria      | Gaiellales       | Gaiella        | agricultural soil bacterium SC-192 | 2,28 | 0,81 | 1,29 | 0,81 | 0,841 | 0,421 | 0,690 | 0,095 |
| Firmicutes       | Bacilli             | Bacillales       | Staphylococcus | Staphylococcus epidermidis         | 5,76 | 0,59 | 0,03 | 0,05 | 0,526 | 0,518 | 0,248 | 0,528 |
| Actinobacteria   | denovo              | denovo           | denovo         | denovo                             | 1,04 | 1,03 | 1,43 | 1,04 | 0,056 | 0,095 | 0,095 | 0,056 |
| Proteobacteria   | denovo              | denovo           | denovo         | denovo                             | 0,59 | 1,26 | 1,40 | 0,91 | 0,310 | 0,548 | 0,421 | 0,310 |
| Gemmatimonadetes | Gemmatimonadetes    | Gemmatimonadales | Gemmatimonas   | Gemmatimonadetes bacterium KBS708  | 0,29 | 1,38 | 0,35 | 1,34 | 0,151 | 0,548 | 0,421 | 0,222 |
| Gemmatimonadetes | Gemmatimonadetes    | Gemmatimonadales | Gemmatimonas   | unidentified bacterium             | 0,44 | 0,95 | 0,89 | 1,30 | 0,421 | 0,841 | 0,421 | 0,095 |
| Proteobacteria   | Alphaproteobacteria | denovo           | denovo         | denovo                             | 0,88 | 0,83 | 1,28 | 0,99 | 0,310 | 1,000 | 1,000 | 0,295 |
| Actinobacteria   | Actinobacteria      | Actinomycetales  | denovo         | denovo                             | 0,57 | 0,94 | 1,09 | 1,13 | 0,530 | 0,841 | 0,462 | 0,463 |
| Actinobacteria   | Actinobacteria      | Actinomycetales  | denovo         | denovo                             | 1,58 | 0,50 | 1,29 | 0,73 | 0,032 | 1,000 | 0,690 | 0,047 |
| Acidobacteria    | Acidobacteria_Gp1   | denovo           | denovo         | denovo                             | 0,16 | 0,55 | 0,56 | 1,69 | 0,690 | 0,310 | 0,548 | 0,690 |
| Proteobacteria   | Betaproteobacteria  | Burkholderiales  | denovo         | denovo                             | 0,64 | 1,01 | 0,63 | 0,99 | 0,340 | 0,012 | 0,151 | 0,841 |
| Proteobacteria   | Betaproteobacteria  | Burkholderiales  | denovo         | denovo                             | 1,26 | 0,99 | 0,64 | 0,57 | 0,032 | 0,528 | 0,421 | 0,008 |
| Actinobacteria   | Actinobacteria      | Actinomycetales  | Blastococcus   | Blastococcus sp. OS1-29            | 0,34 | 0,61 | 1,42 | 0,76 | 0,916 | 0,917 | 0,462 | 0,421 |
| Proteobacteria   | Deltaproteobacteria | Myxococcales     | denovo         | denovo                             | 0,80 | 0,79 | 0,69 | 0,70 | 1,000 | 1,000 | 0,346 | 0,151 |

|                  |                     |                    |                |                                             |      |      |      |      |       |       |       |       |
|------------------|---------------------|--------------------|----------------|---------------------------------------------|------|------|------|------|-------|-------|-------|-------|
| Actinobacteria   | Actinobacteria      | Actinomycetales    | denovo         | denovo                                      | 0,03 | 0,21 | 1,62 | 1,03 | 0,293 | 0,421 | 0,209 | 0,834 |
| Firmicutes       | Bacilli             | Bacillales         | Staphylococcus | Staphylococcus epidermidis PM221            | 3,54 | 0,39 | 0,05 | 0,06 | 0,222 | 0,095 | 0,310 | 0,753 |
| Actinobacteria   | Actinobacteria      | Gaiellales         | Gaiella        | bacterium Ellin7545                         | 0,83 | 0,60 | 0,76 | 0,69 | 0,402 | 0,295 | 0,753 | 0,834 |
| Bacteroidetes    | Sphingobacteriia    | Sphingobacteriales | denovo         | denovo                                      | 1,03 | 0,43 | 0,37 | 0,81 | 0,690 | 0,690 | 0,421 | 0,222 |
| Actinobacteria   | Actinobacteria      | Actinomycetales    | Kineosporia    | Kineosporia rhamnosa (T)                    | 1,45 | 0,68 | 0,17 | 0,33 | 0,548 | 0,032 | 0,094 | 0,295 |
| Acidobacteria    | Acidobacteria_Gp3   | Gp3                | Gp3            | unidentified bacterium                      | 0,17 | 0,33 | 0,25 | 1,20 | 1,000 | 0,032 | 0,032 | 0,841 |
| Actinobacteria   | Actinobacteria      | Actinomycetales    | Arthrobacter   | Arthrobacter sp. L13                        | 0,13 | 0,05 | 1,37 | 0,82 | 1,000 | 0,090 | 0,054 | 0,402 |
| Acidobacteria    | Acidobacteria_Gp3   | Gp3                | Gp3            | bacterium enrichment culture clone SC-2_22  | 0,00 | 0,71 | 0,21 | 0,81 | 0,012 | 0,753 | 0,674 | 0,095 |
| Gemmatimonadetes | Gemmatimonadetes    | Gemmatimonadales   | Gemmatimonas   | Microcystis sp. SAG 43.90                   | 0,03 | 0,78 | 0,20 | 0,61 | 0,056 | 0,833 | 0,753 | 0,012 |
| Actinobacteria   | Actinobacteria      | Actinomycetales    | Arthrobacter   | Arthrobacter sp. S88                        | 0,38 | 0,34 | 0,90 | 0,38 | 0,295 | 0,829 | 1,000 | 0,021 |
| Chloroflexi      | Ktedonobacteria     | Ktedonobacteriales | denovo         | denovo                                      | 0,07 | 0,00 | 1,52 | 0,46 | 0,034 | 0,139 | 0,310 | 0,095 |
| Actinobacteria   | Actinobacteria      | Actinomycetales    | denovo         | denovo                                      | 0,35 | 0,51 | 0,38 | 0,39 | 0,046 | 0,112 | 0,047 | 0,008 |
| Gemmatimonadetes | Gemmatimonadetes    | Gemmatimonadales   | Gemmatimonas   | Gemmatimonadetes bacterium Ellin7146        | 0,32 | 0,40 | 0,17 | 0,62 | 0,139 | 0,139 | 0,421 | 0,056 |
| Proteobacteria   | Gammaproteobacteria | Xanthomonadales    | denovo         | denovo                                      | 0,21 | 0,63 | 0,15 | 0,47 | 0,095 | 0,753 | 1,000 | 0,151 |
| Proteobacteria   | Alphaproteobacteria | Rhizobiales        | Bradyrhizobium | Bradyrhizobium sp. WSM471                   | 0,35 | 0,57 | 0,07 | 0,49 | 0,151 | 0,344 | 0,917 | 0,675 |
| Acidobacteria    | Acidobacteria_Gp1   | Gp1                | Gp1            | bacterium Ellin6528                         | 0,03 | 0,37 | 0,13 | 0,72 | 1,000 | 0,690 | 0,095 | 0,151 |
| Gemmatimonadetes | Gemmatimonadetes    | Gemmatimonadales   | Gemmatimonas   | bacterium Ellin5290                         | 0,02 | 0,49 | 0,33 | 0,49 | 0,834 | 0,115 | 0,295 | 0,172 |
| Actinobacteria   | Actinobacteria      | Actinomycetales    | denovo         | denovo                                      | 0,44 | 0,63 | 0,26 | 0,20 | 0,172 | 0,656 | 0,094 | 0,746 |
| Gemmatimonadetes | Gemmatimonadetes    | Gemmatimonadales   | Gemmatimonas   | bacterium enrichment culture clone auto9_4W | 0,03 | 0,31 | 0,17 | 0,72 | 0,031 | 0,052 | 0,834 | 0,548 |

33

34

|                |                     |                     |                    |                                            |      |      |      |      |       |       |       |       |
|----------------|---------------------|---------------------|--------------------|--------------------------------------------|------|------|------|------|-------|-------|-------|-------|
| Actinobacteria | Actinobacteria      | Actinomycetales     | Nakamurella        | Humicoccus sp. L1886                       | 0,50 | 0,28 | 0,94 | 0,08 | 0,021 | 1,000 | 0,753 | 0,008 |
| Actinobacteria | Actinobacteria      | Gaiellales          | Gaiella            | Gaiella occulta (T)                        | 1,16 | 0,36 | 0,14 | 0,13 | 0,402 | 0,829 | 0,463 | 1,000 |
| Firmicutes     | Bacilli             | Bacillales          | Staphylococcus     | Staphylococcus epidermidis<br>RP62A        | 1,54 | 0,28 | 0,00 | 0,02 | 0,526 | 0,239 | 0,168 | 0,480 |
| Proteobacteria | Betaproteobacteria  | Burkholderiales     | Noviherbaspirillum | Comamonadaceae<br>bacterium MSCB-9         | 0,00 | 0,32 | 0,60 | 0,33 | 0,249 | 0,141 | 0,095 | 0,093 |
| Actinobacteria | Actinobacteria      | Solirubrobacterales | Conexibacter       | bacterium Ellin504                         | 0,22 | 0,18 | 0,46 | 0,39 | 0,548 | 0,075 | 0,690 | 0,095 |
| Proteobacteria | Gammaproteobacteria | denovo              | denovo             | denovo                                     | 0,16 | 0,40 | 0,40 | 0,25 | 0,036 | 0,340 | 0,310 | 0,008 |
| Acidobacteria  | Acidobacteria_Gp3   | denovo              | denovo             | denovo                                     | 0,00 | 0,59 | 0,01 | 0,32 | 0,690 | 0,346 | 0,222 | 0,421 |
| Actinobacteria | Actinobacteria      | Actinomycetales     | Blastococcus       | Blastococcus sp. L1961                     | 0,76 | 0,20 | 0,13 | 0,17 | 0,249 | 0,462 | 0,834 | 0,666 |
| Proteobacteria | Betaproteobacteria  | Burkholderiales     | Burkholderia       | Burkholderia sp. MS4t                      | 0,00 | 0,41 | 0,23 | 0,27 | 1,000 | 0,670 | 0,141 | 0,525 |
| Actinobacteria | Actinobacteria      | Actinomycetales     | Marmoricola        | Marmoricola sp. Gsoil 818                  | 0,50 | 0,27 | 0,20 | 0,17 | 0,016 | 0,116 | 0,600 | 0,841 |
| Proteobacteria | Alphaproteobacteria | Rhizobiales         | denovo             | denovo                                     | 0,12 | 0,23 | 0,03 | 0,47 | 0,310 | 0,750 | 0,151 | 0,059 |
| Actinobacteria | Actinobacteria      | Actinomycetales     | Terrabacter        | Terrabacter lapilli (T)                    | 0,02 | 0,11 | 0,69 | 0,21 | 0,753 | 0,548 | 0,248 | 0,458 |
| Actinobacteria | Actinobacteria      | Actinomycetales     | Blastococcus       | Blastococcus aggregatus                    | 0,53 | 0,28 | 0,16 | 0,11 | 0,424 | 0,045 | 0,025 | 0,140 |
| Proteobacteria | Alphaproteobacteria | Rhodospirillales    | denovo             | denovo                                     | 0,12 | 0,24 | 0,38 | 0,21 | 0,052 | 0,180 | 0,094 | 0,059 |
| Proteobacteria | Betaproteobacteria  | Burkholderiales     | Noviherbaspirillum | Herbaspirillum sp. Sco-D20                 | 0,10 | 0,26 | 0,36 | 0,19 | 0,310 | 0,458 | 0,841 | 0,115 |
| Actinobacteria | Actinobacteria      | Solirubrobacterales | Conexibacter       | Rubrobacterineae<br>bacterium BR7-21       | 0,13 | 0,31 | 0,19 | 0,21 | 0,195 | 0,084 | 0,047 | 0,690 |
| Acidobacteria  | Acidobacteria_Gp3   | Gp3                 | Gp3                | Acidobacteria bacterium<br>SCGC AAA204-D14 | 0,00 | 0,09 | 0,08 | 0,51 | 0,027 | 0,829 | 0,012 | 0,012 |
| Actinobacteria | Actinobacteria      | Solirubrobacterales | Solirubrobacter    | bacterium Ellin6048                        | 0,41 | 0,19 | 0,09 | 0,22 | 1,000 | 0,518 | 0,753 | 0,344 |
| Actinobacteria | Actinobacteria      | Actinomycetales     | Nocardioides       | bacterium Ellin6014                        | 0,39 | 0,21 | 0,10 | 0,21 | 0,753 | 0,458 | 0,338 | 0,504 |

|                  |                     |                     |                  |                                          |      |      |      |      |       |       |       |       |
|------------------|---------------------|---------------------|------------------|------------------------------------------|------|------|------|------|-------|-------|-------|-------|
| Actinobacteria   | Actinobacteria      | Actinomycetales     | Arthrobacter     | Arthrobacter sp. SaCR11                  | 0,03 | 0,09 | 0,49 | 0,25 | 0,396 | 0,057 | 0,012 | 0,346 |
| Acidobacteria    | Acidobacteria_Gp1   | Gp1                 | Gp1              | Actinomycetales                          | 0,16 | 0,18 | 0,10 | 0,31 | 0,295 | 0,402 | 0,463 | 0,141 |
| Actinobacteria   | Actinobacteria      | Actinomycetales     | Blastococcus     | Candidatus Blastococcus massiliensis AP3 | 0,26 | 0,06 | 0,29 | 0,26 | 0,090 | 0,289 | 0,690 | 0,249 |
| Proteobacteria   | Deltaproteobacteria | Myxococcales        | denovo           | denovo                                   | 0,00 | 0,23 | 0,17 | 0,27 | 0,205 | 0,834 | 0,057 | 0,209 |
| Actinobacteria   | Actinobacteria      | Actinomycetales     | Arthrobacter     | Arthrobacter sp. HS4-1                   | 0,45 | 0,06 | 0,33 | 0,11 | 0,014 | 0,054 | 0,036 | 0,074 |
| Proteobacteria   | Alphaproteobacteria | Rhizobiales         | Methylobacterium | Methylobacterium sp. MG- 2011-64-DP      | 0,00 | 0,22 | 0,13 | 0,27 | 0,528 | 0,596 | 0,248 | 0,461 |
| Actinobacteria   | Actinobacteria      | Acidimicrobiales    | Iamia            | bacterium Ellin5273                      | 0,51 | 0,17 | 0,08 | 0,10 | 0,441 | 0,906 | 0,424 | 0,180 |
| Actinobacteria   | Actinobacteria      | Actinomycetales     | Nakamurella      | Nakamurella flavida                      | 0,16 | 0,31 | 0,10 | 0,12 | 1,000 | 0,402 | 0,202 | 0,834 |
| Actinobacteria   | Actinobacteria      | Solirubrobacterales | Solirubrobacter  | bacterium Ellin5249                      | 0,59 | 0,23 | 0,03 | 0,03 | 0,665 | 0,504 | 0,823 | 0,813 |
| Actinobacteria   | Actinobacteria      | Solirubrobacterales | Solirubrobacter  | Solirubrobacter ginsenosidimutans        | 0,63 | 0,23 | 0,02 | 0,02 | 0,346 | 1,000 | 0,458 | 0,136 |
| Acidobacteria    | Acidobacteria_Gp3   | Gp3                 | Gp3              | Actinomycetales                          | 0,00 | 0,09 | 0,04 | 0,42 | 0,463 | 0,463 | 0,917 | 1,000 |
| Chloroflexi      | denovo              | denovo              | denovo           | denovo                                   | 0,39 | 0,14 | 0,26 | 0,06 | 0,295 | 0,036 | 0,016 | 1,000 |
| Acidobacteria    | Acidobacteria_Gp1   | Gp1                 | Gp1              | bacterium Ellin6547                      | 0,03 | 0,18 | 0,12 | 0,25 | 0,753 | 0,344 | 0,690 | 0,036 |
| Gemmatimonadetes | Gemmatimonadetes    | Gemmatimonadales    | Gemmatimonas     | Gemmatimonadetes bacterium LX87          | 0,09 | 0,26 | 0,02 | 0,21 | 0,829 | 0,914 | 0,074 | 0,142 |
| Actinobacteria   | Actinobacteria      | Gaiellales          | Gaiella          | bacterium Ellin7507                      | 0,08 | 0,17 | 0,19 | 0,19 | 0,401 | 0,525 | 0,032 | 0,141 |
| Actinobacteria   | Actinobacteria      | Actinomycetales     | Intrasporangium  | Intrasporangium calvum DSM 43043         | 0,38 | 0,26 | 0,05 | 0,06 | NA    | 0,180 | 0,424 | 0,519 |
| Acidobacteria    | Acidobacteria_Gp1   | Gp1                 | Gp1              | bacterium Ellin7544                      | 0,13 | 0,08 | 0,21 | 0,24 | 0,018 | 0,441 | 0,530 | 0,090 |
| Gemmatimonadetes | Gemmatimonadetes    | Gemmatimonadales    | Gemmatimonas     | Gemmatimonas aurantiaca                  | 0,00 | 0,21 | 0,03 | 0,26 | 0,441 | 0,724 | 0,424 | 0,180 |
| Actinobacteria   | Actinobacteria      | Gaiellales          | Gaiella          | unidentified bacterium                   | 0,48 | 0,06 | 0,25 | 0,05 | 0,753 | 0,046 | 0,139 | 0,284 |

|                |                     |                       |                       |                                                   |      |      |      |      |       |       |       |       |
|----------------|---------------------|-----------------------|-----------------------|---------------------------------------------------|------|------|------|------|-------|-------|-------|-------|
| Proteobacteria | Deltaproteobacteria | Myxococcales          | Kofleria              | Kofleria flava                                    | 0,01 | 0,17 | 0,05 | 0,27 | 0,448 | 0,750 | 0,345 | 0,234 |
| Actinobacteria | Actinobacteria      | Actinomycetales       | Arthrobacter          | Arthrobacter sp. M29                              | 0,00 | 0,12 | 0,26 | 0,20 | 0,289 | 1,000 | 0,528 | 0,012 |
| Actinobacteria | Actinobacteria      | Actinomycetales       | Marmoricola           | Nocardioides iriomotensis                         | 0,42 | 0,16 | 0,12 | 0,04 | 0,917 | 0,036 | 0,142 | 0,584 |
| Actinobacteria | Actinobacteria      | Actinomycetales       | Arthrobacter          | Arthrobacter oryzae                               | 0,48 | 0,15 | 0,02 | 0,08 | 0,434 | 0,724 | 0,194 | 0,441 |
| Acidobacteria  | Acidobacteria_Gp1   | Candidatus_Koribacter | Candidatus_Koribacter | Candidatus Koribacter versatilis Ellin345         | 0,00 | 0,11 | 0,12 | 0,28 | 0,072 | 0,746 | NA    | 0,072 |
| Proteobacteria | Alphaproteobacteria | Sphingomonadales      | denovo                | denovo                                            | 0,18 | 0,24 | 0,11 | 0,08 | 1,000 | 0,674 | 0,115 | 0,753 |
| Proteobacteria | Alphaproteobacteria | Caulobacterales       | Phenylobacterium      | Phenylobacterium sp. W2.09- 62                    | 0,24 | 0,13 | 0,09 | 0,16 | 0,396 | 1,000 | 0,916 | 1,000 |
| Proteobacteria | Alphaproteobacteria | Rhizobiales           | denovo                | denovo                                            | 0,06 | 0,09 | 0,21 | 0,20 | 0,009 | 0,192 | 1,000 | 0,020 |
| Actinobacteria | Actinobacteria      | Actinomycetales       | Arthrobacter          | Arthrobacter sp. 7B-895                           | 0,00 | 0,03 | 0,18 | 0,30 | 0,015 | 0,168 | 0,753 | 0,462 |
| Nitrospirae    | Nitrospira          | Nitrospirales         | Nitrospira            | Candidatus Nitrospira bockiana                    | 0,03 | 0,06 | 0,05 | 0,34 | 0,205 | 0,373 | 0,917 | 0,753 |
| Proteobacteria | Alphaproteobacteria | Rhodospirillales      | Skermanella           | Skermanella aerolata                              | 0,28 | 0,30 | 0,00 | 0,02 | 0,012 | 0,525 | 0,690 | 0,012 |
| Actinobacteria | Actinobacteria      | Actinomycetales       | Terrabacter           | Terrabacter carboxydvorans (T)                    | 0,03 | 0,03 | 0,28 | 0,20 | 0,138 | 1,000 | 0,517 | 0,401 |
| Actinobacteria | Actinobacteria      | Gaiellales            | Gaiella               | bacterium enrichment culture clone F44x D7 T3 E05 | 0,23 | 0,03 | 0,37 | 0,06 | 0,180 | 0,441 | NA    | 0,424 |
| Actinobacteria | Actinobacteria      | Actinomycetales       | Tetrasphaera          | Tetrasphaera sp. Ellin115                         | 0,44 | 0,20 | 0,03 | 0,00 | 0,834 | 0,600 | 0,141 | 0,675 |
| Actinobacteria | Actinobacteria      | Actinomycetales       | Nocardioides          | Nocardioides sp. S147                             | 0,45 | 0,19 | 0,00 | 0,02 | 0,071 | 0,434 | 0,528 | 1,000 |
| Actinobacteria | Actinobacteria      | Actinomycetales       | Nocardioides          | Nocardioides islandensis (T)                      | 0,16 | 0,19 | 0,04 | 0,13 | 0,530 | 0,222 | 0,292 | 0,752 |
| Bacteroidetes  | Flavobacteriia      | Flavobacteriales      | Chryseobacterium      | Chryseobacterium sp. CI02                         | 0,03 | 0,37 | 0,02 | 0,03 | 0,290 | 0,914 | 0,289 | 0,670 |
| Acidobacteria  | Acidobacteria_Gp1   | Gp1                   | Gp1                   | bacterium Ellin7522                               | 0,06 | 0,15 | 0,10 | 0,17 | 0,387 | 0,737 | 0,093 | 0,142 |
| Actinobacteria | Actinobacteria      | Actinomycetales       | Streptomyces          | Streptomyces viridochromogenes subsp. komabensis  | 0,02 | 0,25 | 0,00 | 0,16 | 0,441 | 0,724 | 0,424 | 0,180 |

|                |                     |                    |                    |                                                     |      |      |      |      |       |       |       |       |
|----------------|---------------------|--------------------|--------------------|-----------------------------------------------------|------|------|------|------|-------|-------|-------|-------|
| Proteobacteria | Betaproteobacteria  | Burkholderiales    | Noviherbaspirillum | Oxalobacter sp. W1.09-142                           | 0,19 | 0,08 | 0,12 | 0,16 | 0,115 | 0,113 | 0,402 | 0,195 |
| Actinobacteria | Actinobacteria      | Actinomycetales    | Arthrobacter       | Arthrobacter globiformis                            | 0,26 | 0,13 | 0,14 | 0,05 | 0,750 | 0,834 | 0,172 | 0,173 |
| Proteobacteria | Alphaproteobacteria | Caulobacteriales   | denovo             | denovo                                              | 0,18 | 0,17 | 0,08 | 0,08 | 0,203 | 0,830 | 1,000 | 0,015 |
| Proteobacteria | Alphaproteobacteria | Rhodospirillales   | Skermanella        | Azospirillum sp. enrichment culture clone VanCtr101 | 0,09 | 0,08 | 0,45 | 0,00 | 1,000 | 0,341 | 0,070 | 0,027 |
| Proteobacteria | Alphaproteobacteria | Sphingomonadales   | denovo             | denovo                                              | 0,02 | 0,17 | 0,17 | 0,10 | 0,084 | 0,130 | 0,501 | 0,576 |
| Acidobacteria  | Acidobacteria_Gp3   | Gp3                | Gp3                | bacterium Ellin7504                                 | 0,00 | 0,04 | 0,05 | 0,29 | 0,396 | 1,000 | 0,517 | 0,205 |
| Acidobacteria  | Acidobacteria_Gp10  | Gp10               | Gp10               | Acidobacteria bacterium WY11                        | 0,10 | 0,23 | 0,05 | 0,06 | 1,000 | 1,000 | 0,015 | 0,591 |
| Proteobacteria | Alphaproteobacteria | Rhizobiales        | Bradyrhizobium     | bacterium Ellin6538                                 | 0,00 | 0,09 | 0,00 | 0,25 | 0,158 | 0,519 | 1,000 | 0,011 |
| Firmicutes     | Bacilli             | Bacillales         | Bacillus           | Bacillus sp. SKM136                                 | 0,47 | 0,04 | 0,07 | 0,04 | 0,242 | 0,290 | 0,043 | 0,130 |
| Acidobacteria  | Acidobacteria_Gp3   | Gp3                | Gp3                | agricultural soil bacterium SC-I-77                 | 0,06 | 0,09 | 0,03 | 0,20 | 0,674 | 1,000 | 0,093 | 1,000 |
| Bacteroidetes  | Sphingobacteriia    | Sphingobacteriales | Segetibacter       | Segetibacter aerophilus                             | 0,16 | 0,09 | 0,08 | 0,11 | 0,527 | 1,000 | 0,016 | 0,239 |
| Actinobacteria | Actinobacteria      | Actinomycetales    | Motilibacter       | Actinomycetales bacterium RS-16                     | 0,00 | 0,09 | 0,05 | 0,19 | 0,023 | 0,018 | 0,075 | 0,032 |
| Proteobacteria | Betaproteobacteria  | Burkholderiales    | Ramlibacter        | Ramlibacter tataouinensis TTB310                    | 0,09 | 0,08 | 0,03 | 0,17 | 0,169 | 0,830 | 0,058 | 0,331 |
| Actinobacteria | Actinobacteria      | Actinomycetales    | denovo             | denovo                                              | 0,22 | 0,10 | 0,07 | 0,07 | 0,829 | 0,265 | 0,595 | 0,480 |
| Actinobacteria | Actinobacteria      | Actinomycetales    | Arthrobacter       | Arthrobacter sp. LM3(2011)                          | 0,24 | 0,09 | 0,10 | 0,05 | 1,000 | 0,085 | 0,056 | 0,478 |
| Actinobacteria | Actinobacteria      | Acidimicrobiales   | Aciditerrimonas    | Acidimicrobiae bacterium Ellin 7143                 | 0,03 | 0,11 | 0,16 | 0,08 | 0,600 | 0,230 | 0,036 | 0,443 |
| Acidobacteria  | Acidobacteria_Gp3   | Gp3                | Gp3                | Acidobacteria bacterium LWQ4                        | 0,09 | 0,11 | 0,05 | 0,12 | 1,000 | 0,746 | 0,245 | 0,750 |
| Bacteroidetes  | denovo              | denovo             | denovo             | denovo                                              | 0,23 | 0,11 | 0,15 | 0,00 | 0,527 | 1,000 | 0,599 | 0,116 |
| Proteobacteria | Deltaproteobacteria | denovo             | denovo             | denovo                                              | 0,21 | 0,13 | 0,05 | 0,05 | 0,834 | 1,000 | 0,173 | 0,402 |



|                |                     |                     |                  |                                                       |      |      |      |      |       |       |       |       |
|----------------|---------------------|---------------------|------------------|-------------------------------------------------------|------|------|------|------|-------|-------|-------|-------|
| Actinobacteria | Actinobacteria      | Actinomycetales     | Amycolatopsis    | Amycolatopsis<br>lexingtonensis (T)                   | 0,16 | 0,18 | 0,00 | 0,05 | 0,746 | 0,280 | 0,264 | 0,821 |
| Actinobacteria | Actinobacteria      | Actinomycetales     | Terrabacter      | Terrabacter terrae (T)                                | 0,00 | 0,06 | 0,11 | 0,17 | 0,797 | 0,345 | 0,041 | 0,202 |
| Actinobacteria | Actinobacteria      | Acidimicrobiales    | Ilumatobacter    | unidentified bacterium                                | 0,27 | 0,09 | 0,03 | 0,05 | 0,065 | 0,018 | 0,074 | 0,112 |
| Proteobacteria | Alphaproteobacteria | Rhodospirillales    | Roseomonas       | Acetobacteraceae bacterium<br>GIMN 1.017              | 0,00 | 0,18 | 0,10 | 0,06 | 0,674 | 0,106 | 0,206 | 0,445 |
| Acidobacteria  | Acidobacteria_Gp1   | Gp1                 | Gp1              | bacterium Ellin7529                                   | 0,00 | 0,17 | 0,00 | 0,12 | 0,278 | 0,906 | 0,398 | 0,066 |
| Actinobacteria | Actinobacteria      | Solirubrobacterales | Solirubrobacter  | Solirubrobacter sp. Gsoil 917                         | 0,13 | 0,12 | 0,07 | 0,06 | 0,295 | 1,000 | 0,112 | 0,747 |
| Firmicutes     | Bacilli             | Bacillales          | denovo           | denovo                                                | 0,38 | 0,03 | 0,12 | 0,00 | 0,401 | 0,280 | 1,000 | 0,089 |
| Proteobacteria | Alphaproteobacteria | Caulobacterales     | Caulobacter      | Caulobacter vibrioides                                | 0,00 | 0,10 | 0,09 | 0,12 | 0,093 | 0,480 | 0,462 | 0,085 |
| Firmicutes     | Bacilli             | Bacillales          | denovo           | denovo                                                | 0,06 | 0,18 | 0,07 | 0,03 | 0,519 | 0,203 | 0,012 | 1,000 |
| Actinobacteria | Actinobacteria      | Actinomycetales     | Actinoplanes     | Actinoplanes sp. IR56-<br>Co102                       | 0,00 | 0,24 | 0,00 | 0,04 | 1,000 | 0,607 | 0,192 | 1,000 |
| Actinobacteria | Actinobacteria      | Actinomycetales     | Mycobacterium    | Mycobacterium sp. N1730C                              | 0,32 | 0,11 | 0,01 | 0,00 | 1,000 | 0,525 | 0,015 | 0,338 |
| Actinobacteria | Actinobacteria      | Actinomycetales     | Terrabacter      | Terrabacter sp. A2-62                                 | 0,16 | 0,04 | 0,10 | 0,09 | 0,009 | 1,000 | 0,399 | 0,010 |
| Actinobacteria | Actinobacteria      | Actinomycetales     | Arthrobacter     | Arthrobacter sp. CFM 20                               | 0,21 | 0,07 | 0,08 | 0,04 | 0,667 | 0,332 | 0,023 | 0,462 |
| Actinobacteria | Actinobacteria      | Actinomycetales     | Streptomyces     | Streptomyces sp. 1MR-8                                | 0,00 | 0,17 | 0,03 | 0,08 | 0,829 | 0,462 | 0,289 | 0,916 |
| Proteobacteria | Betaproteobacteria  | Burkholderiales     | Burkholderia     | Burkholderia sp. MG-2011-<br>1- AC                    | 0,00 | 0,04 | 0,09 | 0,16 | 0,449 | 0,666 | 0,243 | 0,833 |
| Proteobacteria | Betaproteobacteria  | Burkholderiales     | Burkholderia     | bacterium enrichment culture<br>clone SC-2_86         | 0,00 | 0,01 | 0,21 | 0,11 | 0,034 | 0,734 | 0,249 | 0,011 |
| Proteobacteria | Alphaproteobacteria | Rhizobiales         | Pseudolabrys     | methanogenic prokaryote<br>enrichment culture B19_111 | 0,03 | 0,06 | 0,07 | 0,14 | 0,396 | 0,723 | 0,009 | 0,600 |
| Proteobacteria | Alphaproteobacteria | Rhizobiales         | denovo           | denovo                                                | 0,00 | 0,15 | 0,07 | 0,06 | 0,071 | 0,331 | 1,000 | 0,243 |
| Proteobacteria | Alphaproteobacteria | Caulobacterales     | Phenylobacterium | Phenylobacterium sp. P-28                             | 0,02 | 0,17 | 0,03 | 0,06 | 0,752 | 0,829 | 0,172 | 0,115 |

|                |                     |                                    |                  |                                       |      |      |      |      |       |       |       |       |
|----------------|---------------------|------------------------------------|------------------|---------------------------------------|------|------|------|------|-------|-------|-------|-------|
| Proteobacteria | Alphaproteobacteria | Alphaproteobacteria_incertae_sedis | Rhizomicrobium   | bacterium Ellin329                    | 0,03 | 0,09 | 0,00 | 0,14 | 0,584 | 0,502 | 0,034 | 0,209 |
| Actinobacteria | Actinobacteria      | Actinomycetales                    | Cryptosporangium | Cryptosporangium minutisporangium (T) | 0,12 | 0,17 | 0,00 | 0,02 | 0,066 | 0,501 | 0,203 | 0,012 |
| Proteobacteria | Alphaproteobacteria | Rhizobiales                        | Bradyrhizobium   | Bradyrhizobium sp. IV-102             | 0,00 | 0,09 | 0,00 | 0,16 | 0,511 | 1,000 | 0,262 | 0,101 |
| Proteobacteria | Alphaproteobacteria | Rhodospirillales                   | Skermanella      | Skermanella sp. JC5                   | 0,03 | 0,18 | 0,04 | 0,03 | 0,236 | 0,034 | 0,463 | 0,675 |
| Actinobacteria | Actinobacteria      | Actinomycetales                    | Tetrasphaera     | actinomycete S23403                   | 0,45 | 0,02 | 0,01 | 0,00 | 0,007 | 0,029 | 0,424 | 0,600 |
| Proteobacteria | Alphaproteobacteria | Alphaproteobacteria_incertae_sedis | Rhizomicrobium   | bacterium Ellin335                    | 0,00 | 0,07 | 0,03 | 0,14 | 0,249 | 0,236 | 0,018 | 0,515 |
| Proteobacteria | Deltaproteobacteria | Myxococcales                       | Kofleria         | Kofleria sp. DSM 53797                | 0,03 | 0,07 | 0,03 | 0,13 | 0,044 | 0,911 | 0,116 | 0,091 |
| Actinobacteria | Actinobacteria      | Actinomycetales                    | Nocardioides     | Nocardioides sp. S23405               | 0,17 | 0,11 | 0,00 | 0,05 | 0,478 | 0,406 | 0,246 | 0,141 |
| Proteobacteria | Betaproteobacteria  | Burkholderiales                    | Massilia         | Kartchner Caverns bacterium MI-10a    | 0,00 | 0,11 | 0,00 | 0,13 | 0,180 | 0,180 | NA    | NA    |
| Actinobacteria | Actinobacteria      | Actinomycetales                    | Actinoplanes     | Actinoplanes sp. RI44-Va104           | 0,00 | 0,11 | 0,02 | 0,11 | 0,283 | 0,434 | 0,114 | 0,675 |
| Actinobacteria | Actinobacteria      | Gaiellales                         | Gaiella          | metal-contaminated soil clone K20-25  | 0,11 | 0,18 | 0,01 | 0,00 | 1,000 | 1,000 | 1,000 | 0,833 |
| Actinobacteria | Actinobacteria      | Solirubrobacterales                | Solirubrobacter  | Solirubrobacter soli (T)              | 0,15 | 0,14 | 0,01 | 0,02 | 1,000 | 0,195 | 0,289 | 0,371 |
| Actinobacteria | Actinobacteria      | Actinomycetales                    | Streptomyces     | Streptomyces canu                     | 0,29 | 0,08 | 0,01 | 0,02 | 0,009 | 0,232 | 0,598 | 0,059 |
| Actinobacteria | Actinobacteria      | Gaiellales                         | Gaiella          | Actinomycetales                       | 0,09 | 0,01 | 0,23 | 0,03 | 1,000 | 0,284 | 0,675 | 0,168 |
| Proteobacteria | Alphaproteobacteria | Caulobacterales                    | Phenylobacterium | Phenylobacterium sp. DLS-83           | 0,09 | 0,09 | 0,07 | 0,05 | 0,071 | 0,180 | 1,000 | 0,020 |
| Actinobacteria | Actinobacteria      | Acidimicrobiales                   | Aciditerrimonas  | Aciditerrimonas ferrireducens (T)     | 0,03 | 0,07 | 0,03 | 0,11 | 0,025 | 0,118 | NA    | 0,424 |
| Actinobacteria | Actinobacteria      | Actinomycetales                    | Amycolatopsis    | Amycolatopsis rifamycinica (T)        | 0,06 | 0,11 | 0,05 | 0,06 | 0,670 | 0,478 | 0,134 | 0,797 |
| Actinobacteria | Actinobacteria      | Actinomycetales                    | Streptomyces     | Streptomyces sp. NEAU-CF1             | 0,06 | 0,09 | 0,07 | 0,06 | 0,915 | 0,823 | 0,525 | 0,338 |
| Acidobacteria  | Acidobacteria_Gp1   | Gp1                                | Gp1              | Acidobacteriaceae bacterium A2-1c     | 0,00 | 0,09 | 0,03 | 0,11 | 0,239 | 0,023 | 0,027 | 0,753 |

|                  |                     |                      |                  |                                          |      |      |      |      |       |       |       |       |
|------------------|---------------------|----------------------|------------------|------------------------------------------|------|------|------|------|-------|-------|-------|-------|
| Proteobacteria   | Betaproteobacteria  | Burkholderiales      | Massilia         | Massilia aerolata                        | 0,06 | 0,09 | 0,00 | 0,09 | 0,737 | 0,737 | 0,737 | 0,504 |
| Actinobacteria   | Actinobacteria      | Actinomycetales      | Arthrobacter     | Pseudomonas moraviensis                  | 0,03 | 0,00 | 0,08 | 0,14 | 0,180 | 0,441 | NA    | 0,424 |
| Actinobacteria   | Actinobacteria      | Actinomycetales      | Arthrobacter     | Arthrobacter defluvii                    | 0,05 | 0,03 | 0,07 | 0,11 | 0,072 | 0,239 | NA    | 0,424 |
| Acidobacteria    | Acidobacteria_Gp1   | Gp1                  | Gp1              | bacterium K-5b2                          | 0,00 | 0,03 | 0,05 | 0,14 | 0,130 | 0,813 | 0,346 | 0,055 |
| Actinobacteria   | Actinobacteria      | Actinomycetales      | Amycolatopsis    | Amycolatopsis bullii                     | 0,06 | 0,10 | 0,07 | 0,03 | 0,345 | 0,441 | 0,138 | 0,112 |
| Proteobacteria   | Alphaproteobacteria | Rhizobiales          | Methylobacterium | Methylobacterium longum                  | 0,08 | 0,04 | 0,07 | 0,08 | 0,138 | 0,827 | 0,824 | 0,202 |
| Actinobacteria   | Actinobacteria      | Actinomycetales      | Arthrobacter     | soil bacterium 14V-14                    | 0,00 | 0,04 | 0,10 | 0,09 | 0,171 | 0,914 | 0,110 | 0,434 |
| Gemmatimonadetes | Gemmatimonadetes    | Gemmatimonadales     | Gemmatimonas     | Gemmatimonadetes bacterium WWH24         | 0,00 | 0,09 | 0,00 | 0,11 | 0,329 | 0,140 | 0,337 | 0,596 |
| Proteobacteria   | Alphaproteobacteria | Caulobacteriales     | Phenylobacterium | bacterium Ellin5060                      | 0,03 | 0,09 | 0,02 | 0,08 | 0,344 | 0,057 | 1,000 | 0,596 |
| Actinobacteria   | Actinobacteria      | Acidimicrobiales     | Ilumatobacter    | unidentified marine bacterioplankton     | 0,25 | 0,04 | 0,03 | 0,01 | 0,398 | 0,441 | 0,007 | 0,424 |
| Proteobacteria   | Alphaproteobacteria | Rhizobiales          | Beijerinckia     | Beijerinckia mobilis (T)                 | 0,00 | 0,09 | 0,00 | 0,11 | 0,745 | 0,504 | 0,825 | 0,742 |
| Acidobacteria    | Acidobacteria_Gp1   | Gp1                  | Gp1              | bacterium enrichment culture clone PA_42 | 0,00 | 0,11 | 0,01 | 0,08 | 0,528 | 0,829 | 0,071 | 1,000 |
| Actinobacteria   | Actinobacteria      | Solirubrobacteriales | Conexibacter     | bacterium Ellin5025                      | 0,02 | 0,02 | 0,12 | 0,09 | 0,025 | 0,180 | 0,246 | 0,014 |
| Proteobacteria   | Alphaproteobacteria | Rhizobiales          | Bradyrhizobium   | Bradyrhizobium group bacterium Ellin127  | 0,00 | 0,09 | 0,00 | 0,11 | 0,130 | 0,373 | 0,753 | 0,456 |
| Proteobacteria   | Betaproteobacteria  | Burkholderiales      | Ramlibacter      | Variovorax sp. P-9                       | 0,03 | 0,07 | 0,03 | 0,09 | 0,607 | 0,441 | 0,424 | 0,424 |
| Actinobacteria   | Actinobacteria      | Actinomycetales      | Terrabacter      | Terrabacter sp. Ellin102                 | 0,09 | 0,06 | 0,05 | 0,06 | 0,106 | 0,504 | 0,332 | 0,386 |
| Firmicutes       | Bacilli             | Bacillales           | Bacillus         | Bacillus sp. SKM7                        | 0,23 | 0,06 | 0,03 | 0,02 | 0,287 | 0,346 | 0,242 | 0,091 |
| Proteobacteria   | Alphaproteobacteria | Rhodospirillales     | Dongia           | bacterium Ellin314                       | 0,08 | 0,09 | 0,00 | 0,06 | 0,833 | 0,265 | 0,045 | 0,441 |
| Actinobacteria   | Actinobacteria      | Actinomycetales      | Arthrobacter     | soil bacterium 14V-08                    | 0,03 | 0,10 | 0,07 | 0,05 | 0,020 | 1,000 | 0,916 | 0,011 |

52 **Figure S1.** Rarefaction curves for each sample (Bulk Soil 1, Bulk Soil 2, Rhiz 1, Rhiz 2;  
53 five sub-samples each). Analysis was performed using MicrobiomeAnalyst, a free available  
54 on-line software (<https://www.microbiomeanalyst.ca>).

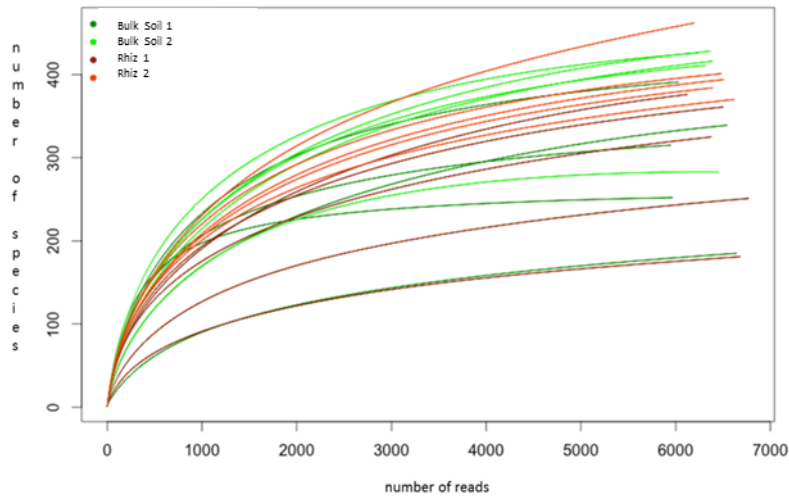

55  
56  
57  
58  
59

60 **Figure S2.** Hierarchical clustering and Heatmap visualization at the genus level measured  
61 as Euclidean distance by using the Ward algorithm according to A) variable time (flowering  
62 vs. early fruiting time) and B) variable space (bulk soil vs. rhizosphere). Analysis was  
63 performed using MicrobiomeAnalyst, a free available on-line software  
64 (<https://www.microbiomeanalyst.ca>).

A)

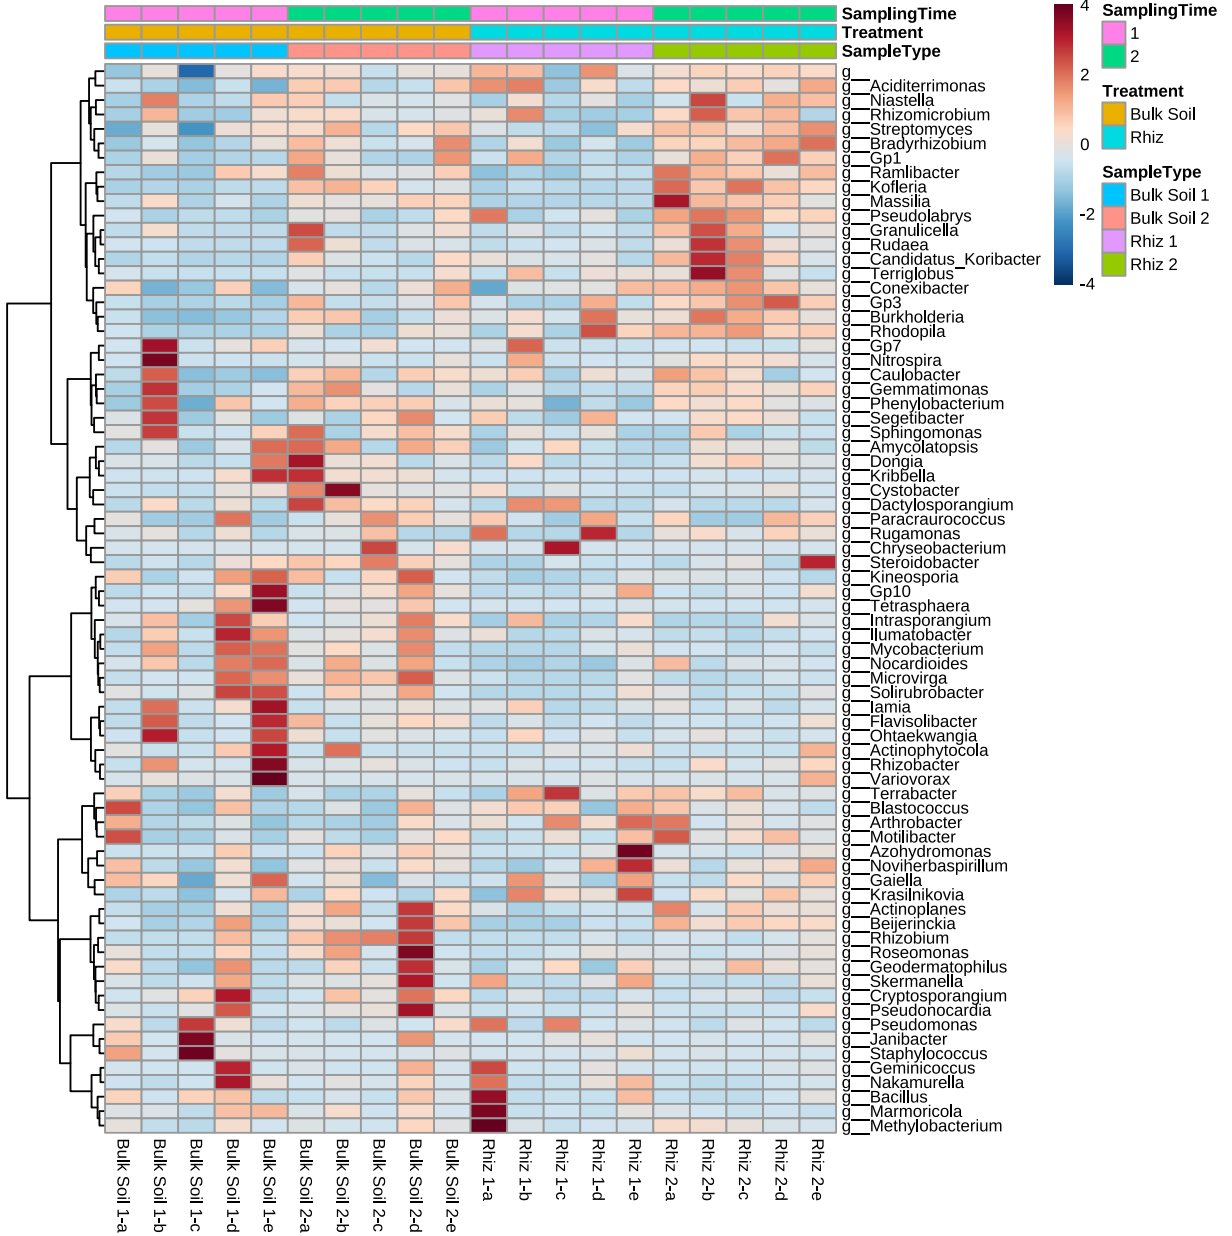

65

66

67

68

69

70

71

72

B)

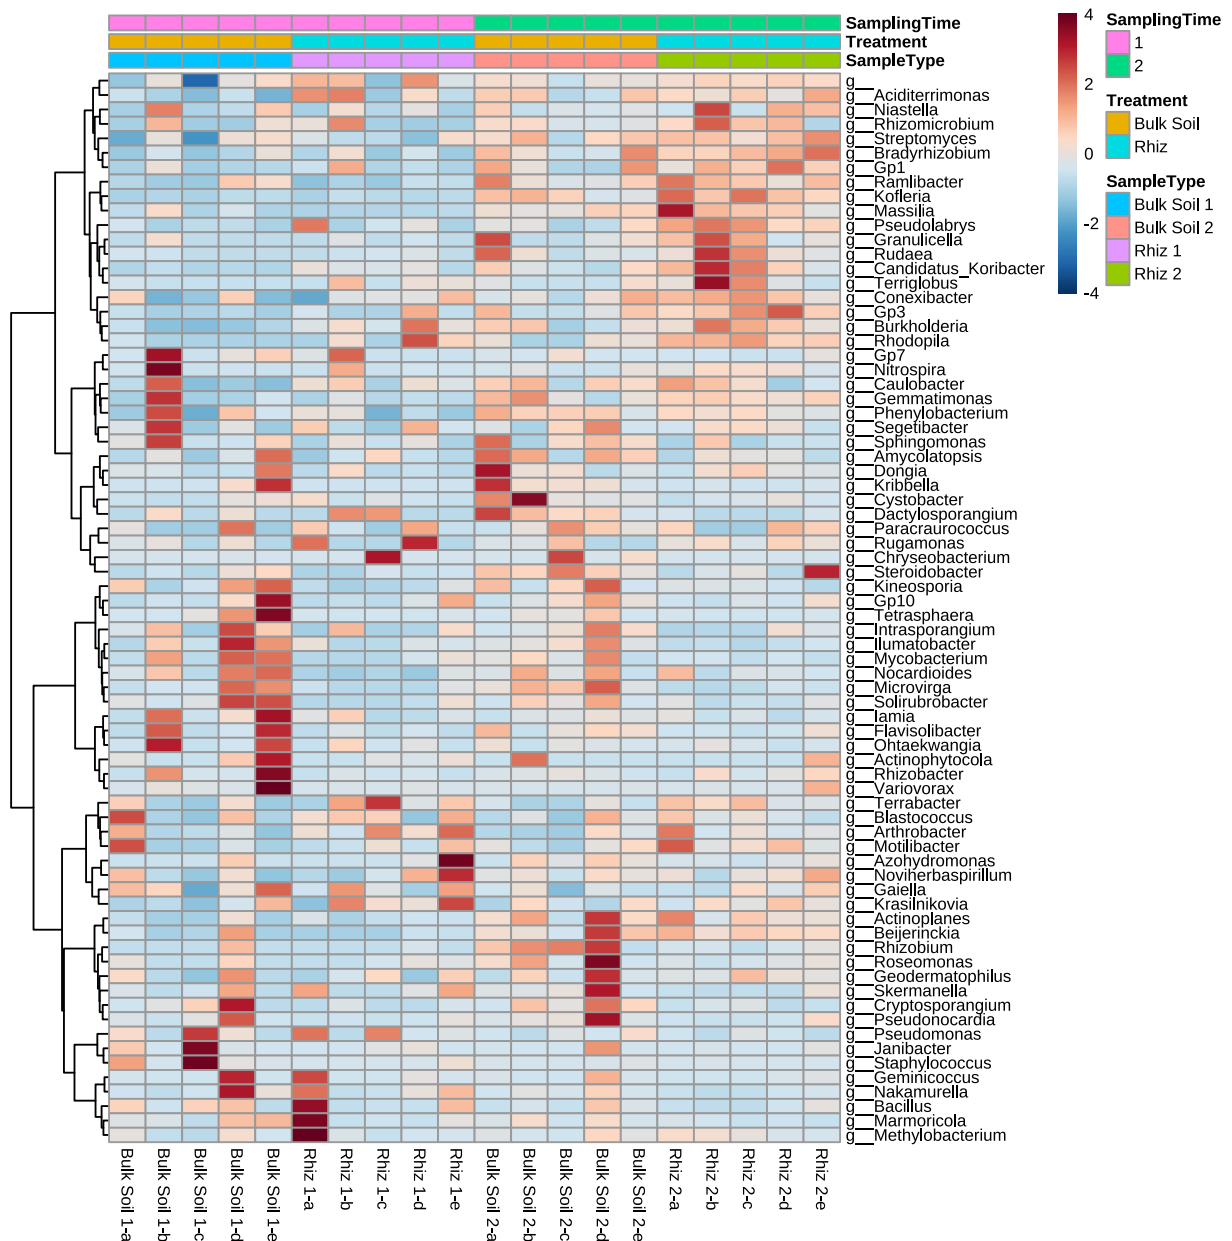

74

75

76 **Figure S3.** Pattern Search using as variable the sampling time, based on the top 25 genera  
 77 identified: *Pseudomonas*, *Nakamurella*, *Bacillus* and GP7 are the genus more related to the  
 78 variation of the microbiota according to sampling time. Bars represent positive (pink) and  
 79 negative (light blue) value of correlation. Analysis was performed using MicrobiomeAnalyst,  
 80 a free available on-line software (<https://www.microbiomeanalyst.ca>).

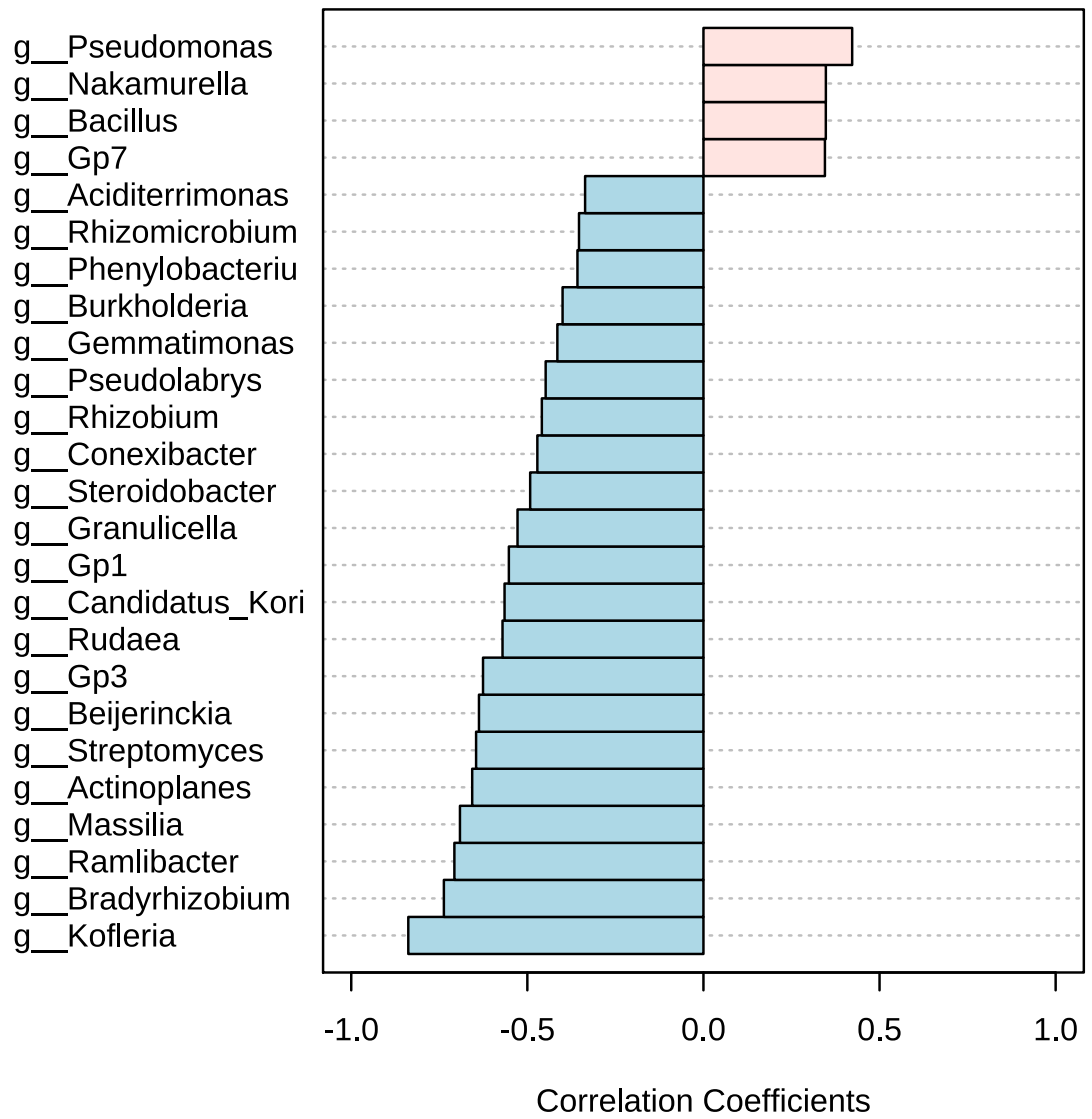

81

82
